# Supplementary material for: Peptide Mapping, In Silico and In Vivo Analysis of Allergenic Sorghum Profilin Peptides
Source: MDPI journal article supplement (doi:10.3390/medicina55050178), 2019-05-21
Supplement: s1 [file s1]

# Supplementary Materials:

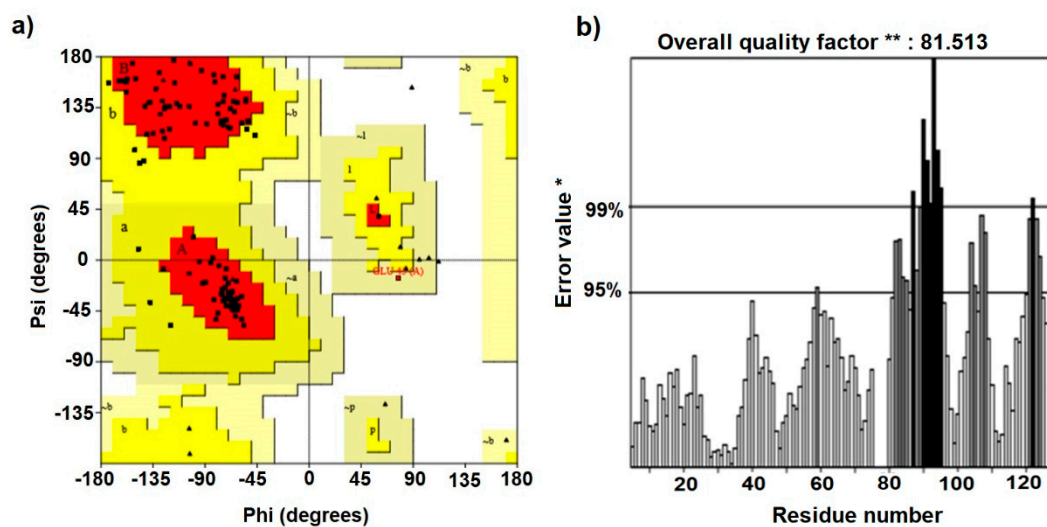

**Figure S1:** (a) Ramachandran plot of Profilin homology model showing 91.4% of amino acids are in favored region and rest in allowed regions (b) ERRAT profile of the built profilin model before simulations.

## a) Peptide 3 (PF3)

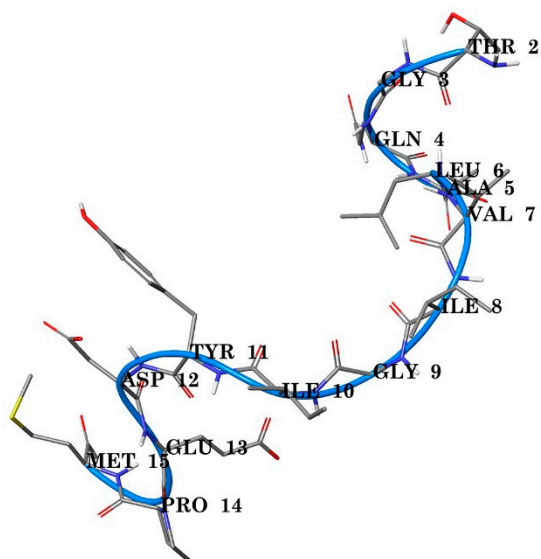

## b) Peptide 4 (PF4)

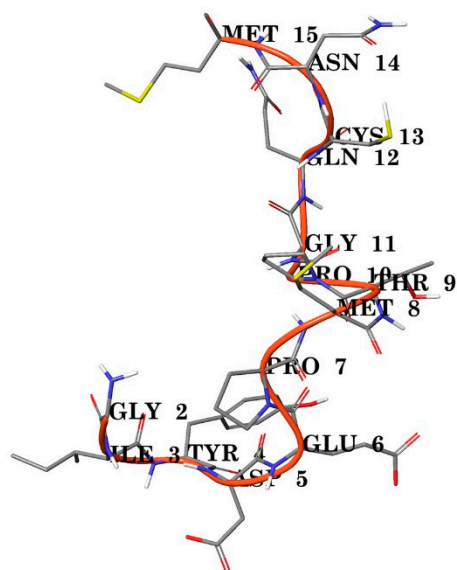

**Figure S2:** (a) Binding pose of PF3 sequence (b) Binding pose of PF4 sequence

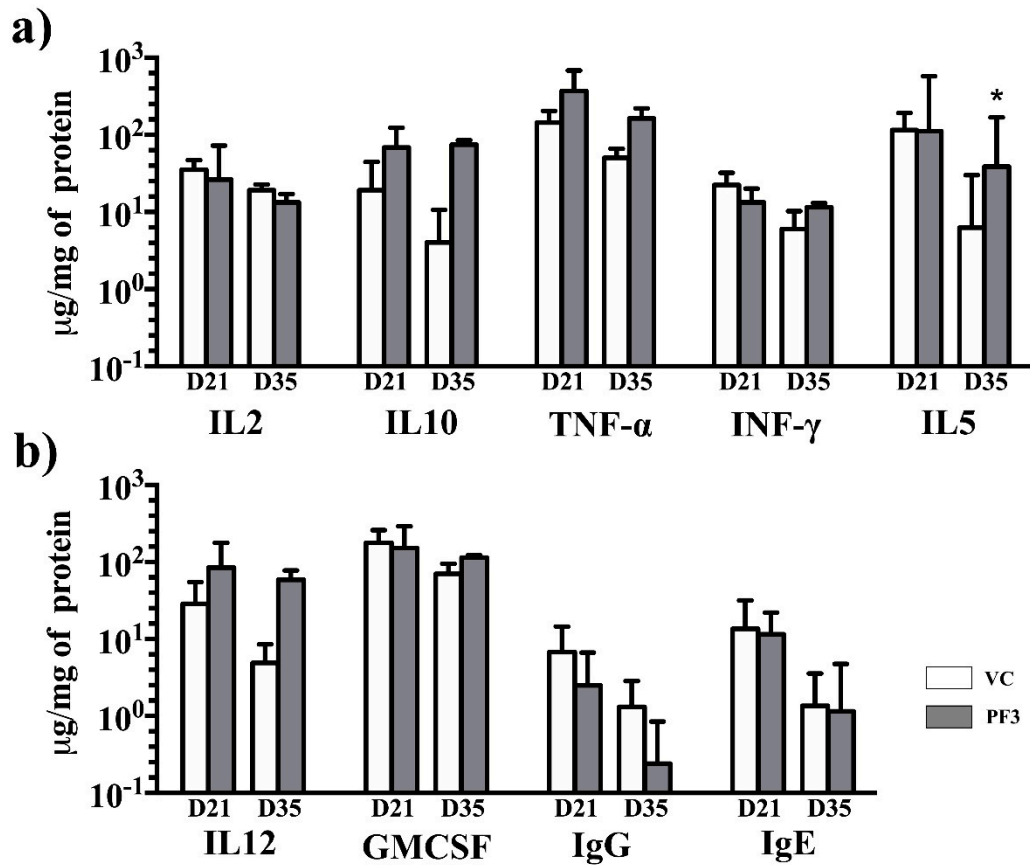

**Figure S3:** Quantification of Cytokines: PF-4 peptide sensitized mouse serum samples were estimated for (a) IL2, IL10, TNF $\alpha$ , INF- $\gamma$  and IL5 (b) IL12, GMCSF, IgG and IgE profiles of PF4 sensitized mice. The data shown is Mean  $\pm$  SD (n = 3). \*represents significance at 95% confidence.
